# Supplementary material for: Abrupt mid-20th Century Onset of Hydrographic Instability in Nordic Seas Inflow Waters
Source: Research Square preprint supplement (doi:10.21203/rs.3.rs-3743437/v1), 2025-09-23
Supplement: Supplementary file 1 [file 2b343f06c4bab37dd64ddfb8.docx]

**Supplementary Material**

**Abrupt mid-20th Century Onset of Hydrographic Instability in Nordic Seas Inflow Waters**

Sejrup, H.P.,Lehman, S.J**.,** Hjelstuen, B.O., Becker, L.W.M., Runarsdottir, R.L., and Ionita, M.

**1. Chronology:**


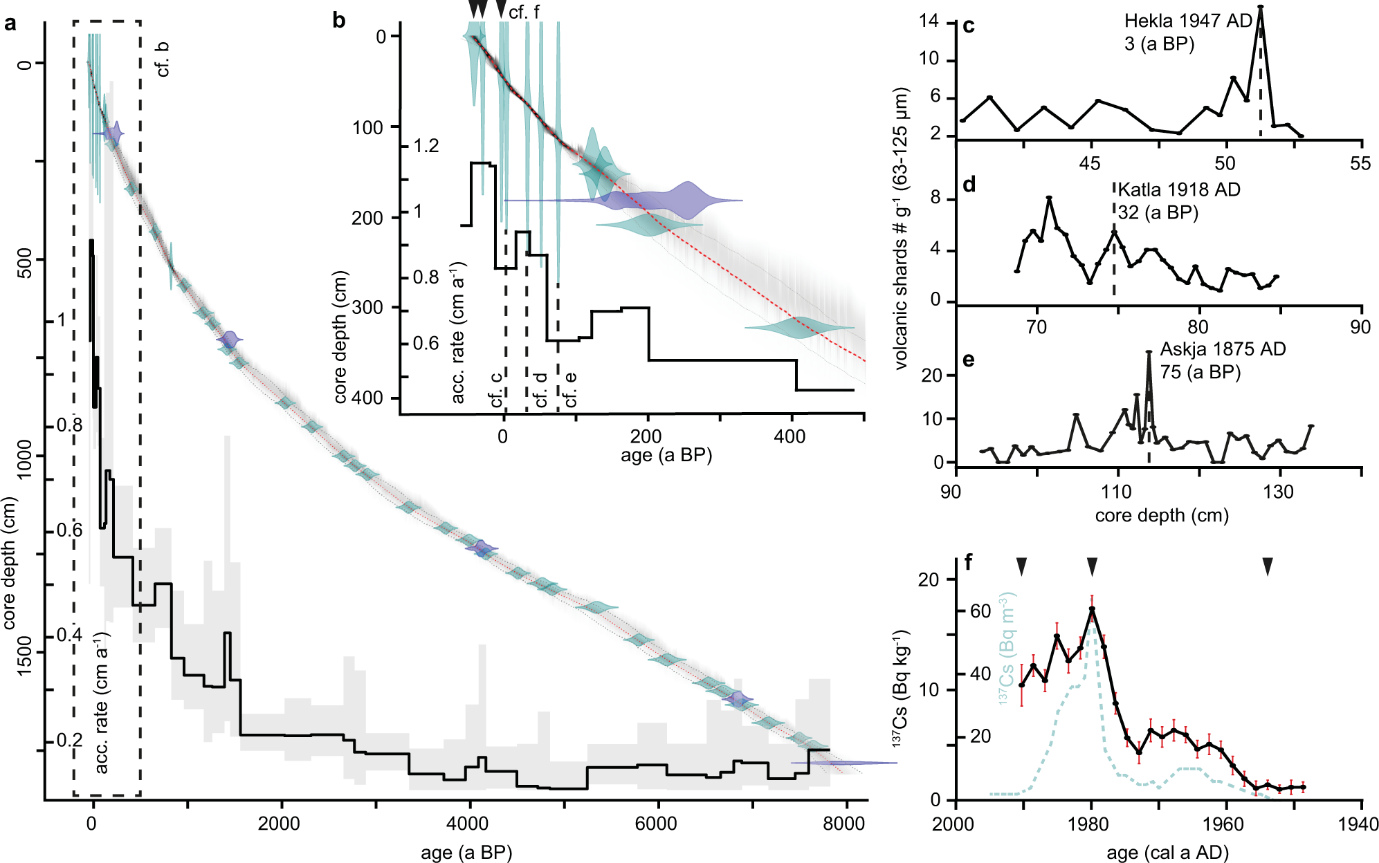


**Figure S1. Age control, core GS13-182-01C** (after Becker et al. 2020). Sediment age was determined by correlation of the high resolution XRF records of Ca/Fe from core GS13 and from the previously well-dated record of nearby core P1-003 (Sejrup et al., 2011; Sejrup et al., 2010) along with new 14C dates, 210Pb/137Cs measurements, and tephra grain counts in GS13 itself. **a)** GS13 AMS 14C dates (purple), 210Pb/137Cs (red), tephra (triangles) and Ca/Fe tie-points (green) used to derive the age model. Age model uncertainties were determined from estimated uncertainties of individual age control points and a resulting ensemble of age model iterations. The grey shaded area denotes the 95% confidence interval around the median age model represented by the red line. The derived accumulation rate associated with the median age model is given by the black line along with its estimated 5–95% quantile range (grey area). **b)** Enlarged view of the last 550 years, with age control estimates from tephra counts (black triangles, per panels **c-e**) and 137Cs (panel **f)**. **c–e)** Tephra counts of basaltic-intermediate and rhyolitic shards in the 63–125 μm fraction denoting the number of shards related to three historic eruptions (for details see Becker et al., 2020). **f)** All 137Cs measurements from 210Pb/137Cs dating (n = 25) compared to the total 137Cs concentration in the SW Barents Sea (Gao et al., 2005). The triangles denote the 137Cs events used for age modelling. See **Supplementary Table S1** for age model input.

**2. Sources of possible mechanical and chemical bias:**

**a. Reworking and redeposition**

As noted in the main text, re-working of *N. inc.* from glacial age sediments or from colder locations is highly unlikely. Firstly, both absolute and implied relative abundances of *N. inc*. (vs. the polar foraminifer *Neogloboquadrina pachyderma sin*.) indicate reductions in *N. inc*. at times of anomalously elevated d18O, opposite to what would be expected by reworking and/or transport of exogenous specimens of *N. inc.* into local sediments at those times (**Fig. S2a** and **b**). Further, the abundance of *N. inc*. relative to *N. pachyderma sin.* is generally consistent with the temperature interpretation of overall d18O record, indicating warming conditions (i.e., more *N. inc.* relative to *N. pachyderma sin.*) prior to AD 1950, followed by the sudden onset of cooling at that time, and then a temperature recovery beginning in the 1980’s, consistent with hydrographic data discussed in the main text. Further, there is no evidence in sediment grain size data (**Fig. S3**) for sediment disturbance that might be expected in response to episodic “inworking” of exogenous material at times of anomalously elevated d18O.

**
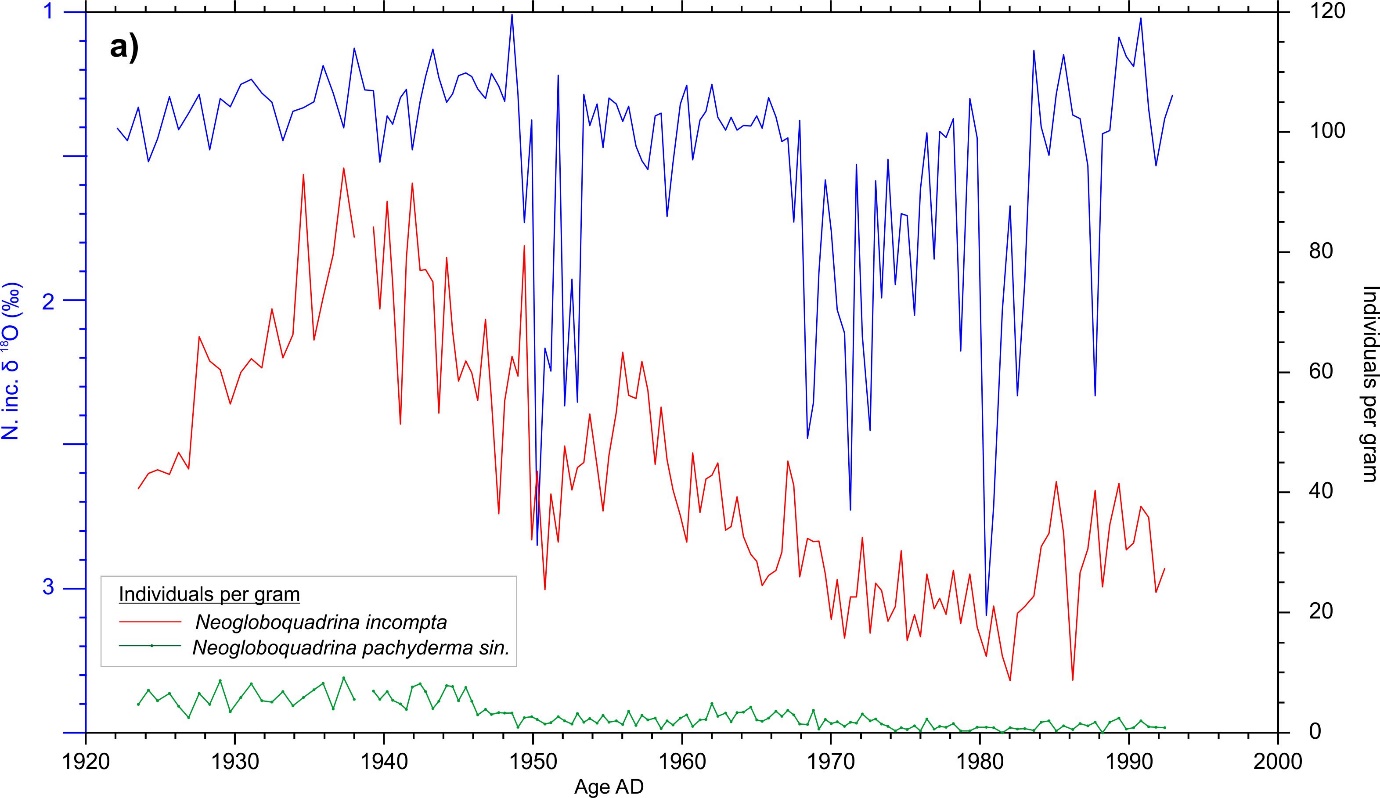
**

**
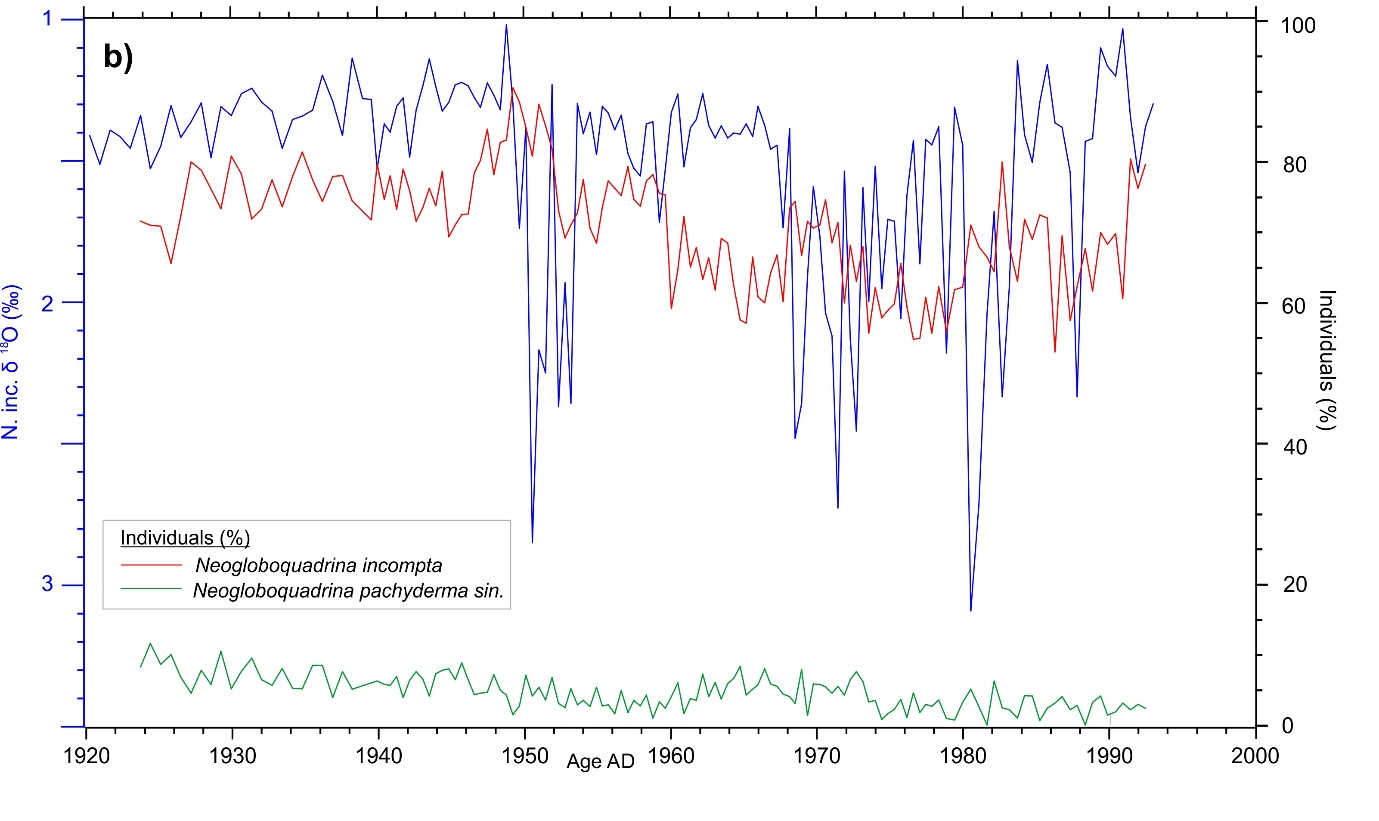
**

**Figure S2. a)** Absolute abundances of *Neogloboquadrina incompta* (red curve) and *Neogloboquadrina pachyderma sin*. (green curve) in the upper part of core GS13, expressed as number of individual specimens per gram of dry sediment, compared to d18O results (Fig. 2b; blue curve) discussed in the main text. **b)** As in a) but expressed as relative abundance of the same species in terms of percent fraction of the total planktonic foraminiferal fauna.


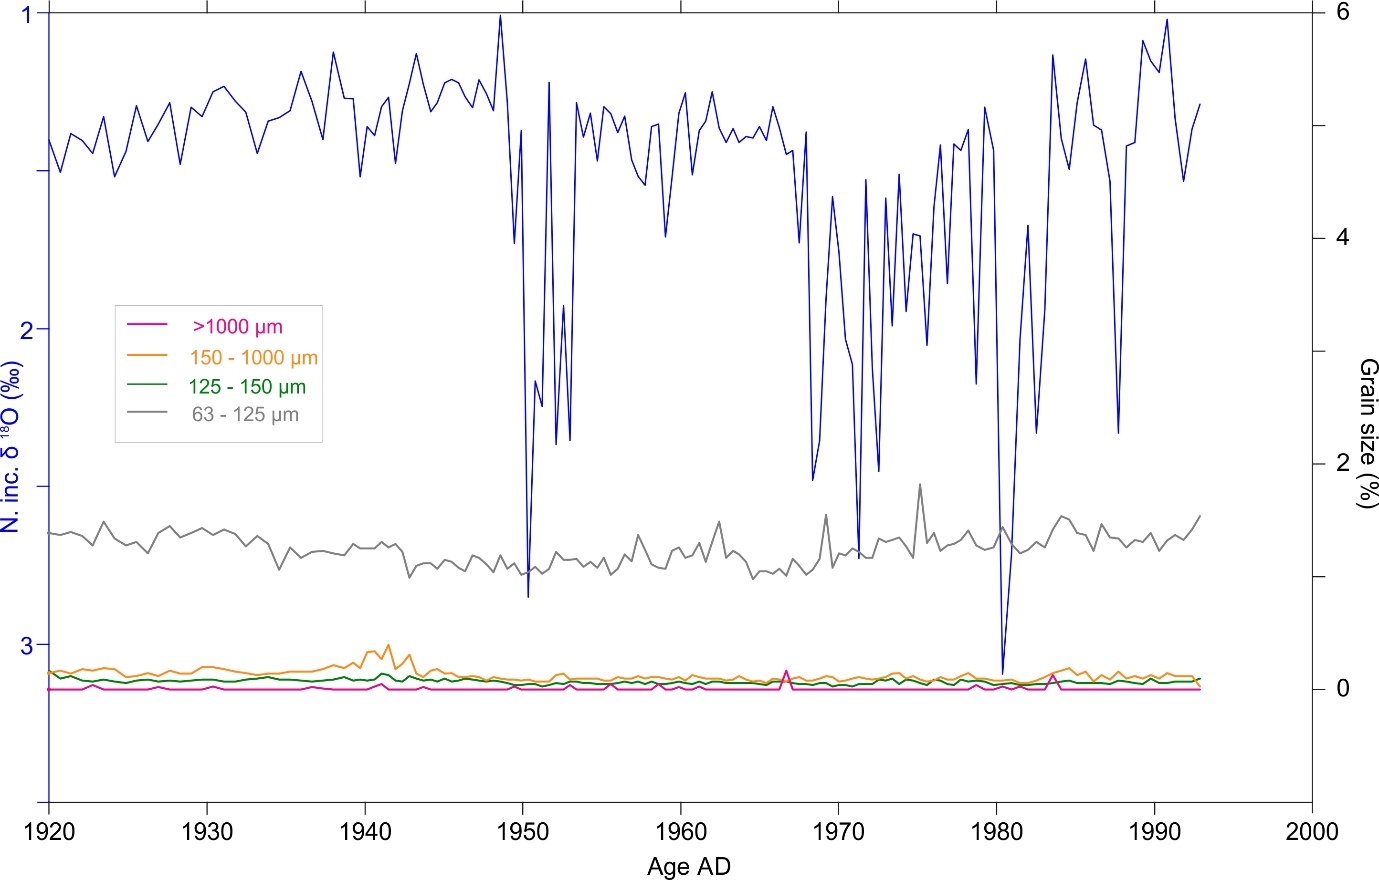


**Figure S3.** Grain size distribution of sediments in the upper part of core GS13 compared to d18O results (Fig. 2b) discussed in the main text.

**b. Chemical effects**

Previous work on GS13 sediments (Becker et al., 2020) notes excellent preservation of biogenic carbonate in the form of both foraminifera and coccolithophorids (with the latter greatly dominating the carbonate fraction). Thus, dissolution is not expected to have significantly impacted on the measured d18O values. Further, photomicrographs of individual foraminifera do not show signs of secondary or authigenic carbonate formation (Becker et al., 2020). And while authigenic carbonate formation may occur without leaving substantial visual evidence (see for example Pearson et al., 2001), we note that authigenic formation would be extremely unlikely within the Storegga Slide Scar, where deposition rates of silt and clay are extremely high, carbonate concentrations are never greater than 25% dry weight, and foraminiferal concentrations average just 64 specimens per gram (Becker et al., 2020). Indeed, such high levels of sedimentary non-carbonate silt and clay are generally considered to be protective, greatly mitigating against chemical recrystallization.

**Table S1. Age model control ages for core GS13** (after Becker et al. (2020))

| ID | depth from (cm) | depth to (cm) | depth (cm) | 14C  age (a BP) | ± STD  (a) | !R (a) | ± !STD  (a) | !13C (‰) | age  (cal. a BP) | ± STD  (a) | median modelled age (cal. a BP) | ± 2 sigma STD (a) | material / type |
| --- | --- | --- | --- | --- | --- | --- | --- | --- | --- | --- | --- | --- | --- |
| 210Pb top of core |  |  | 0.00 |  |  |  |  |  | -42 | 3 | -43.6 | 15.7 | 137Cs event |
| 210Pb sellafield |  |  | 13.00 |  |  |  |  |  | -30 | 1 | -30.1 | 2.7 | 137Cs event |
| 210Pb first Cs |  |  | 43.00 |  |  |  |  |  | -4 | 1 | -4.1 | 2.5 | 137Cs event |
| Hekla1947 |  |  | 51.25 |  |  |  |  |  | 3 | 1 | 3.3 | 2.5 | tephra |
| Katla1918 |  |  | 75.25 |  |  |  |  |  | 32 | 1 | 31.9 | 3.0 | tephra |
| tie-point #1 |  |  | 93.00 |  |  |  |  |  | 51 | 1 | 51.0 | 2.9 | Ca/Fe tie-point |
| Askja1875 |  |  | 113.8 |  |  |  |  |  | 74.76 | 1 | 74.8 | 2.8 | Ca/Fe tie-point |
| tie-point #2 |  |  | 141.20 |  |  |  |  |  | 122 | 6 | 119.8 | 11.7 | Ca/Fe tie-point |
| tie-point #3 |  |  | 152.00 |  |  |  |  |  | 139 | 8 | 137.2 | 14.2 | Ca/Fe tie-point |
| CURL-19081 | 180.80 | 182.30 | 181.30 | 775 | 20 | 190 | 5 | 2.7 |  |  | 178.1 | 29.9 | N. incompta & G. bulloides |
| tie-point #4 |  |  | 208.30 |  |  |  |  |  | 201 | 20 | 216.6 | 34.1 | Ca/Fe tie-point |
| tie-point #5 |  |  | 321.60 |  |  |  |  |  | 409 | 21 | 421.2 | 43.8 | Ca/Fe tie-point |
| tie-point #6 |  |  | 430.35 |  |  |  |  |  | 661 | 17 | 656.3 | 37.5 | Ca/Fe tie-point |
| tie-point #7 |  |  | 517.65 |  |  |  |  |  | 829 | 6 | 829.8 | 18.5 | Ca/Fe tie-point |
| tie-point #8 |  |  | 566.55 |  |  |  |  |  | 968 | 21 | 964.7 | 41.1 | Ca/Fe tie-point |
| tie-point #9 |  |  | 636.15 |  |  |  |  |  | 1171 | 31 | 1175.6 | 51.4 | Ca/Fe tie-point |
| tie-point #10 |  |  | 663.50 |  |  |  |  |  | 1270 | 23 | 1264.1 | 45.9 | Ca/Fe tie-point |
| CURL-19083 | 703.10 | 705.10 | 703.60 | 2080 | 20 | 175 | 5 | 5.4 |  |  | 1394.4 | 54.2 | N. incompta & G. bulloides |
| tie-point #11 |  |  | 728.40 |  |  |  |  |  | 1425 | 28 | 1454.8 | 51.2 | Ca/Fe tie-point |
| tie-point #12 |  |  | 763.30 |  |  |  |  |  | 1551 | 29 | 1563.7 | 60.4 | Ca/Fe tie-point |
| tie-point #13 |  |  | 864.60 |  |  |  |  |  | 2039 | 31 | 2030.8 | 71.8 | Ca/Fe tie-point |
| tie-point #14 |  |  | 925.10 |  |  |  |  |  | 2324 | 32 | 2311.8 | 69.9 | Ca/Fe tie-point |
| tie-point #15 |  |  | 999.90 |  |  |  |  |  | 2658 | 34 | 2656.1 | 68.0 | Ca/Fe tie-point |
| tie-point #16 |  |  | 1023.95 |  |  |  |  |  | 2779 | 33 | 2772.4 | 62.6 | Ca/Fe tie-point |
| tie-point #17 |  |  | 1045.95 |  |  |  |  |  | 2912 | 35 | 2891.8 | 62.0 | Ca/Fe tie-point |
| tie-point #18 |  |  | 1129.35 |  |  |  |  |  | 3347 | 38 | 3352.6 | 93.2 | Ca/Fe tie-point |
| tie-point #19 |  |  | 1181.90 |  |  |  |  |  | 3741 | 36 | 3720.2 | 86.5 | Ca/Fe tie-point |
| tie-point #20 |  |  | 1212.25 |  |  |  |  |  | 3988 | 40 | 3950.4 | 79.2 | Ca/Fe tie-point |
| CURL-19126 | 1233.25 | 1234.25 | 1233.75 | 4255 | 20 | 175 | 5 | 0.8 |  |  | 4088.1 | 70.4 | N. incompta & G. bulloides |
| tie-point #21 |  |  | 1247.40 |  |  |  |  |  | 4166 | 35 | 4166.3 | 66.3 | Ca/Fe tie-point |
| tie-point #22 |  |  | 1296.15 |  |  |  |  |  | 4507 | 37 | 4496.1 | 87.9 | Ca/Fe tie-point |
| tie-point #23 |  |  | 1322.60 |  |  |  |  |  | 4764 | 46 | 4717.2 | 94.5 | Ca/Fe tie-point |
| tie-point #24 |  |  | 1337.55 |  |  |  |  |  | 4870 | 44 | 4845.5 | 83.2 | Ca/Fe tie-point |
| tie-point #25 |  |  | 1383.25 |  |  |  |  |  | 5343 | 64 | 5243.1 | 134.4 | Ca/Fe tie-point |
| tie-point #26 |  |  | 1465.75 |  |  |  |  |  | 5789 | 46 | 5774.3 | 104.0 | Ca/Fe tie-point |
| tie-point #27 |  |  | 1515.65 |  |  |  |  |  | 6088 | 57 | 6086.0 | 118.1 | Ca/Fe tie-point |
| tie-point #28 |  |  | 1574.95 |  |  |  |  |  | 6527 | 49 | 6505.1 | 117.0 | Ca/Fe tie-point |
| tie-point #29 |  |  | 1595.65 |  |  |  |  |  | 6685 | 53 | 6656.8 | 81.2 | Ca/Fe tie-point |
| CURL-19082 | 1615.65 | 1616.60 | 1616.15 | 6545 | 25 | 175 | 5 | 1 |  |  | 6797.0 | 73.3 | N. incompta & G. bulloides |
| tie-point #30 |  |  | 1630.25 |  |  |  |  |  | 6880 | 50 | 6881.1 | 72.0 | Ca/Fe tie-point |
| tie-point #31 |  |  | 1676.10 |  |  |  |  |  | 7160 | 49 | 7161.0 | 97.8 | Ca/Fe tie-point |
| tie-point #32 |  |  | 1714.65 |  |  |  |  |  | 7489 | 38 | 7448.6 | 92.2 | Ca/Fe tie-point |
| tie-point #33 |  |  | 1735.25 |  |  |  |  |  | 7635 | 45 | 7591.2 | 79.0 | Ca/Fe tie-point |
| Storegga +400 a (R) |  |  | 1777.90 | 7650 | 250 | 175 | 5 | NA |  |  | 7817.4 | 150.2 | Ref. 17 |

**Table S2.** Stable isotope timeseries for core GS13 (see also: 10.5281/zenodo.10617999 (will be published))

**Table S2**. Cont.

**Table S2**. Cont.

**Table S3. Replicate isotopic analyses**

| **Age AD** | **d 13C/12C Run 1** | **d 18O/16O Run 1** | **d 13C/12C Run 2** | **d 18O/16O Run 2** | **d 13C/12C Run 3** | **d 18O/16O Run 3** | **n** | **d 13C/12C Average** | **d18O/16O Average** | **d18O/16O STDEV** |
| --- | --- | --- | --- | --- | --- | --- | --- | --- | --- | --- |
| 1987,70 | -0,14 | 2,33 | -0,44 | 2,04 | -0,35 | 4,09 | 3 | -0,31 | 2,82 | 1,11 |
| 1982,52 | 0,24 | 2,33 | 0,22 | 2,54 |  |  | 2 | 0,23 | 2,44 | 0,15 |
| 1980,94 | 0,11 | 2,71 | 0,06 | 3,17 | -0,46 | 2,81 | 3 | -0,10 | 2,90 | 0,24 |
| 1980,38 | 0,19 | 3,09 | 0,16 | 3,11 |  |  | 3 | 0,18 | 3,10 | 0,01 |
| 1978,72 | 0,23 | 2,18 | 0,16 | 1,83 | -0,13 | 1,74 | 3 | 0,09 | 1,91 | 0,23 |
| 1901,01 | 1,18 | 3,12 | 0,49 | 1,94 |  |  | 2 | 0,84 | 2,53 | 0,83 |
| 1900,46 | 0,34 | 1,43 | 0,28 | 1,42 |  |  | 2 | 0,31 | 1,43 | 0,01 |
| 1776,11 | -0,02 | 1,31 | 0,16 | 1,40 |  |  | 2 | 0,07 | 1,36 | 0,06 |

**Table S4. Representative estimate of the development of hydrographic observations within the Nordic Seas Basin,** expressed as the number of hydrocasts (OSD plus XBT) from 60o-80oN x 40oW-20oE in 5 year bins available from the WODB09 at <https://www.nodc.noaa.gov/OC5/WOD09/pr_wod09.html>

| **Year** | **No of casts** |
| --- | --- |
| 1930 | 2468 |
| 1935 | 3528 |
| 1940 | 5551 |
| 1945 | 4335 |
| 1950 | 8440 |
| 1955 | 20036 |
| 1960 | 24391 |
| 1965 | 23206 |


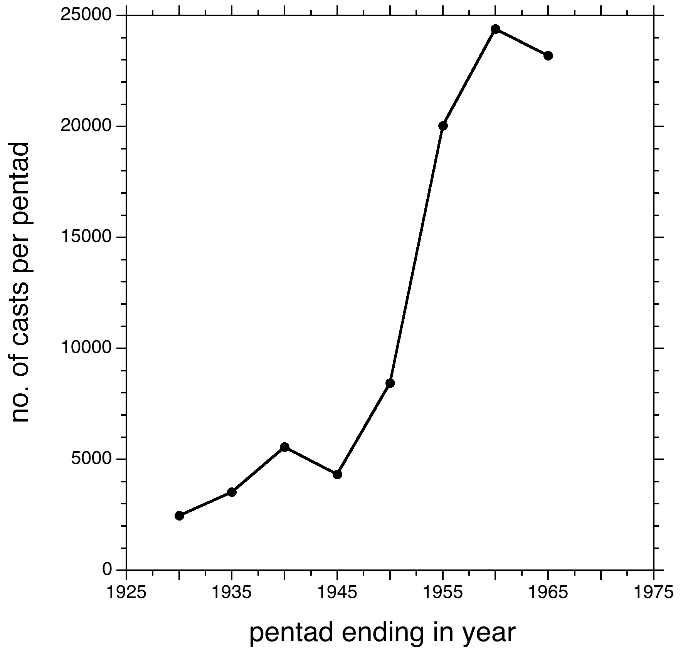


**References**

Becker, L.W.M., Sejrup, H.P., Hjelstuen, B.O., Haflidason, H., Kjennbakken, H., Werner, J.P., 2020. Palaeo-productivity record from Norwegian Sea enables North Atlantic Oscillation (NAO) reconstruction for the last 8000 years. Npj Clim Atmos Sci 3.

Gao, Y.Q., Drange, H., Bentsen, M., Johannessen, O.M., 2005. Tracer-derived transit time of the waters in the eastern Nordic Seas. Tellus B 57, 332-340.

Pearson, P.N., Ditchfield, P.W., Singano, J., Harcourt-Brown, K.G., Nicholas, C.J., Olsson, R.K.,

Sejrup, H.P., Haflidason, H., Andrews, J.T., 2011. A Holocene North Atlantic SST record and regional climate variability. Quat. Sci. Rev. 30, 3181-3195.

Sejrup, H.P., Lehman, S.J., Haflidason, H., Noone, D., Muscheler, R., Berstad, I.M., Andrews, J.T., 2010. Response of Norwegian Sea temperature to solar forcing since 1000 AD. J Geophys Res-Oceans 115.
